# Supplementary material for: Deep-Dwelling Populations of Mediterranean Corallium rubrum and Eunicella cavolini: Distribution, Demography, and Co-Occurrence
Source: MDPI journal article supplement (doi:10.3390/biology11020333), 2022-02-20
Supplement: s1 [file s1]

## SUPPLEMENTARY MATERIAL

# Deep-Dwelling Populations of Mediterranean *Corallium rubrum* and *Eunicella cavolini*: Distribution, Demography, and Co-occurrence

Laura Carugati <sup>1,\*</sup>, Davide Moccia <sup>1</sup>, Lorenzo Bramanti <sup>2</sup>, Rita Cannas <sup>1</sup>, Maria Cristina Follesa <sup>1</sup>, Susanna Salvadori <sup>1</sup> and Alessandro Cau <sup>1</sup>

<sup>1</sup> Department of Life and Environmental Sciences, University of Cagliari, Via T. Fiorelli 1, 09126 Cagliari, Italy; mociadavide@unica.it (D.M.); rcannas@unica.it (R.C.); follesac@unica.it (M.C.F.); salvador@unica.it (S.S.); alessandrocau@unica.it (A.C.)

<sup>2</sup> Laboratoire d'Ecogéochimie des Environnements Benthiques (LECOB), Sorbonne Universités, Université Pierre-et-Marie-Curie, Centre National de la Recherche Scientifique (CNRS), Observatoire Oceanologique, F-66650 Banyuls sur Mer, France; lorenzo.bramanti@obs-banyuls.fr

\* Correspondence: laura.carugati@unica.it

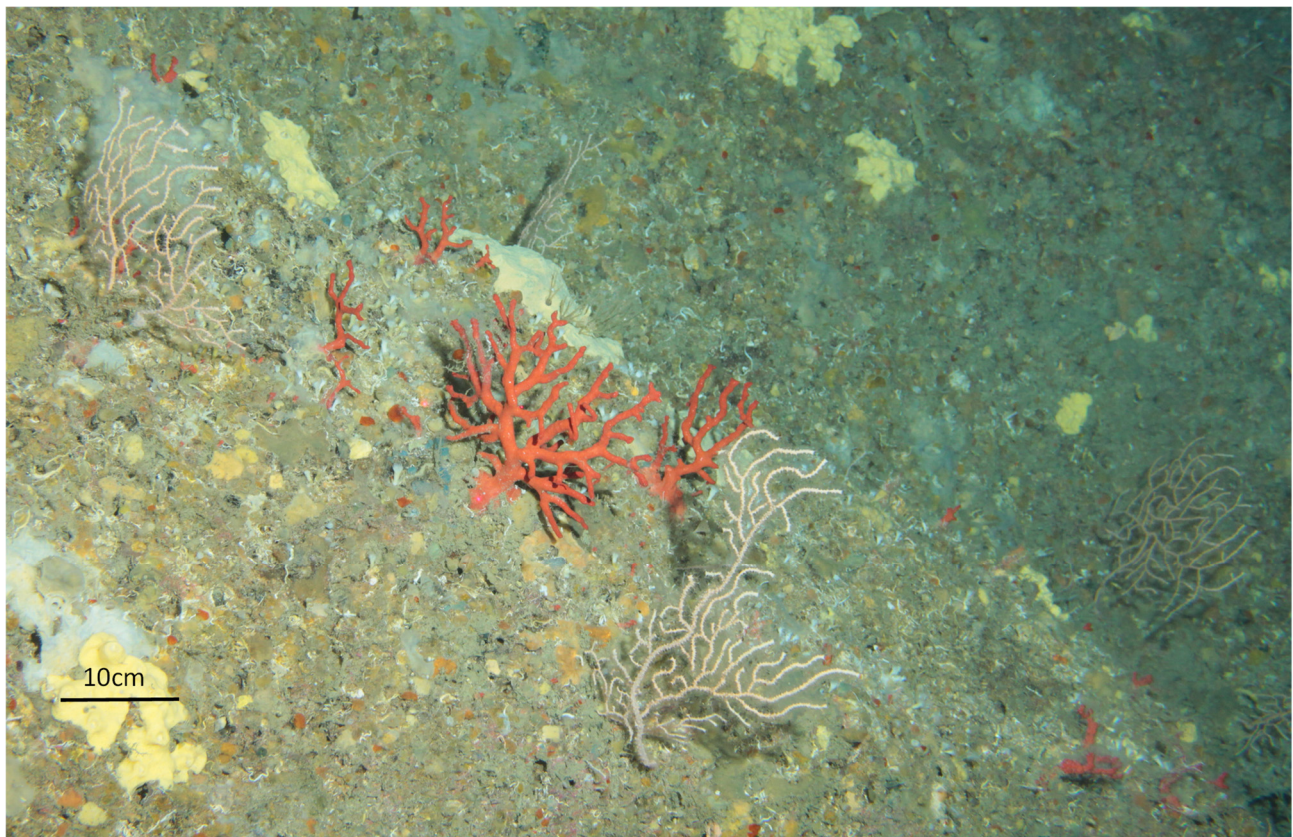

**Figure S1.** Example of frame used in this study with the reference scale provided by the red coloured laser beams.

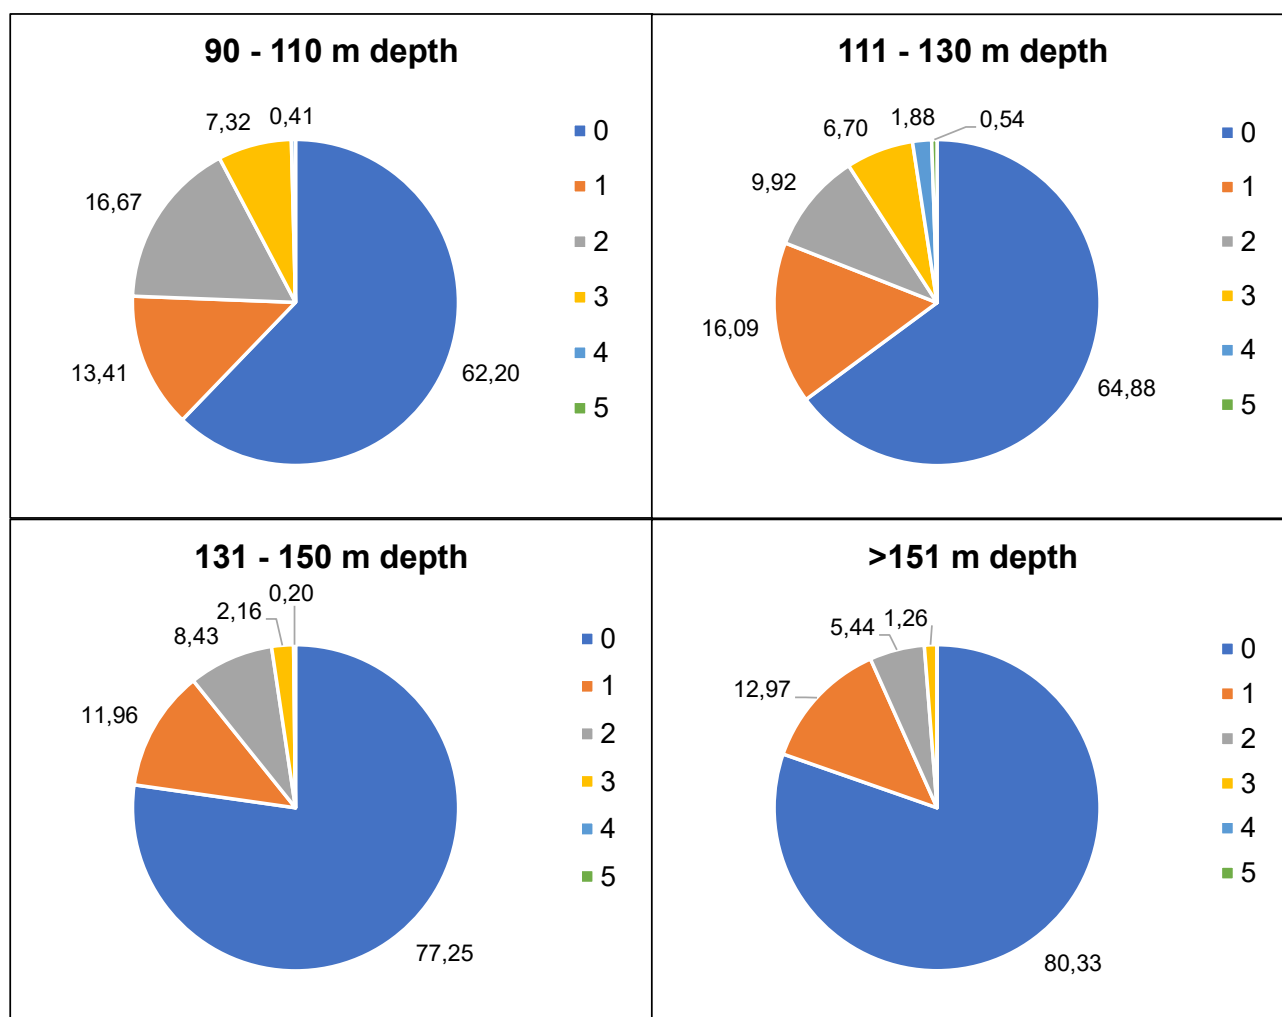

**Figure S2.** Pie chart representing the relative percentages of the highest level of branching in *C. rubrum* colonies, across the depth-categories investigated. The number in the legend corresponds to the maximum branching pattern.

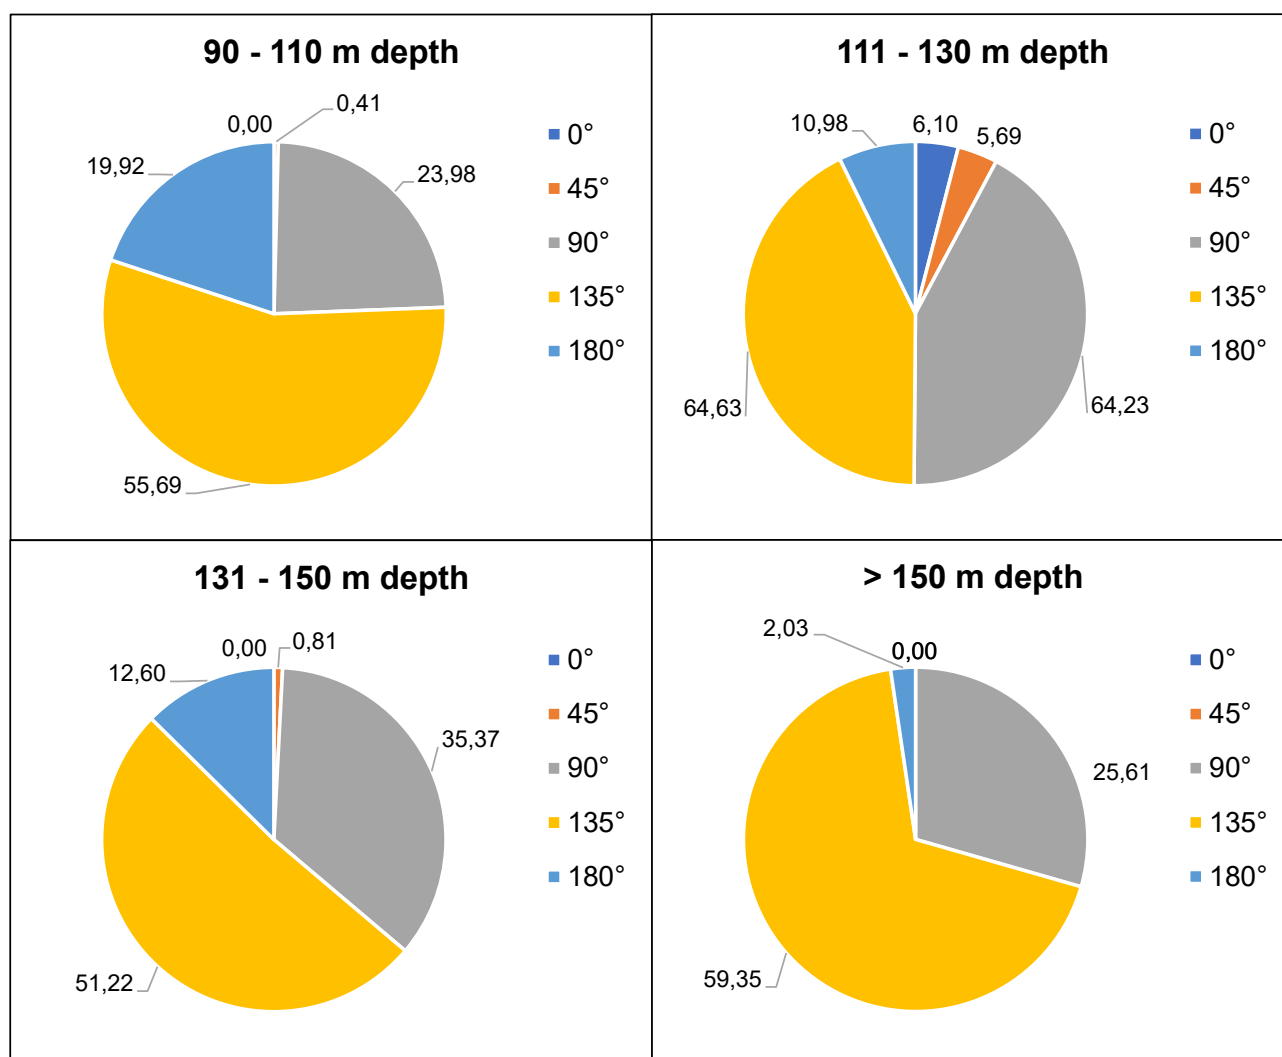

**Figure S3.** Pie chart representing the orientation of *C. rubrum* colonies (expressed as relative %), across the depth-categories investigated.

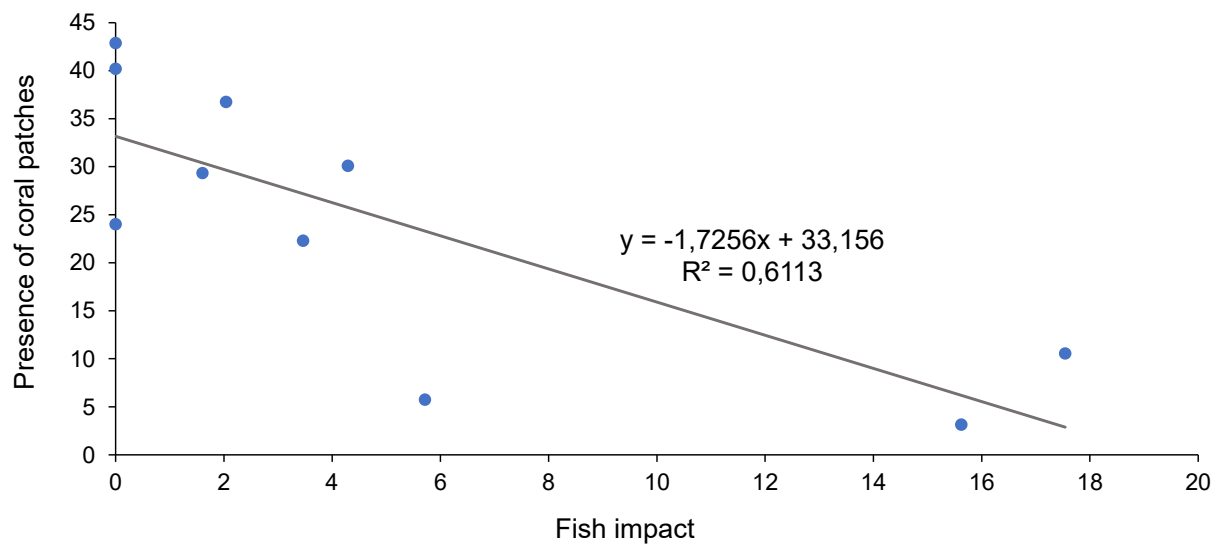

**Figure S4.** Relationship between the presence of red coral (expressed as % of analyzed frames including red coral colonies), vs fishing impact (expressed as % of analyzed frames including lost fishing gears) in the investigated areas (n=10, R=0.783, p<0.01).

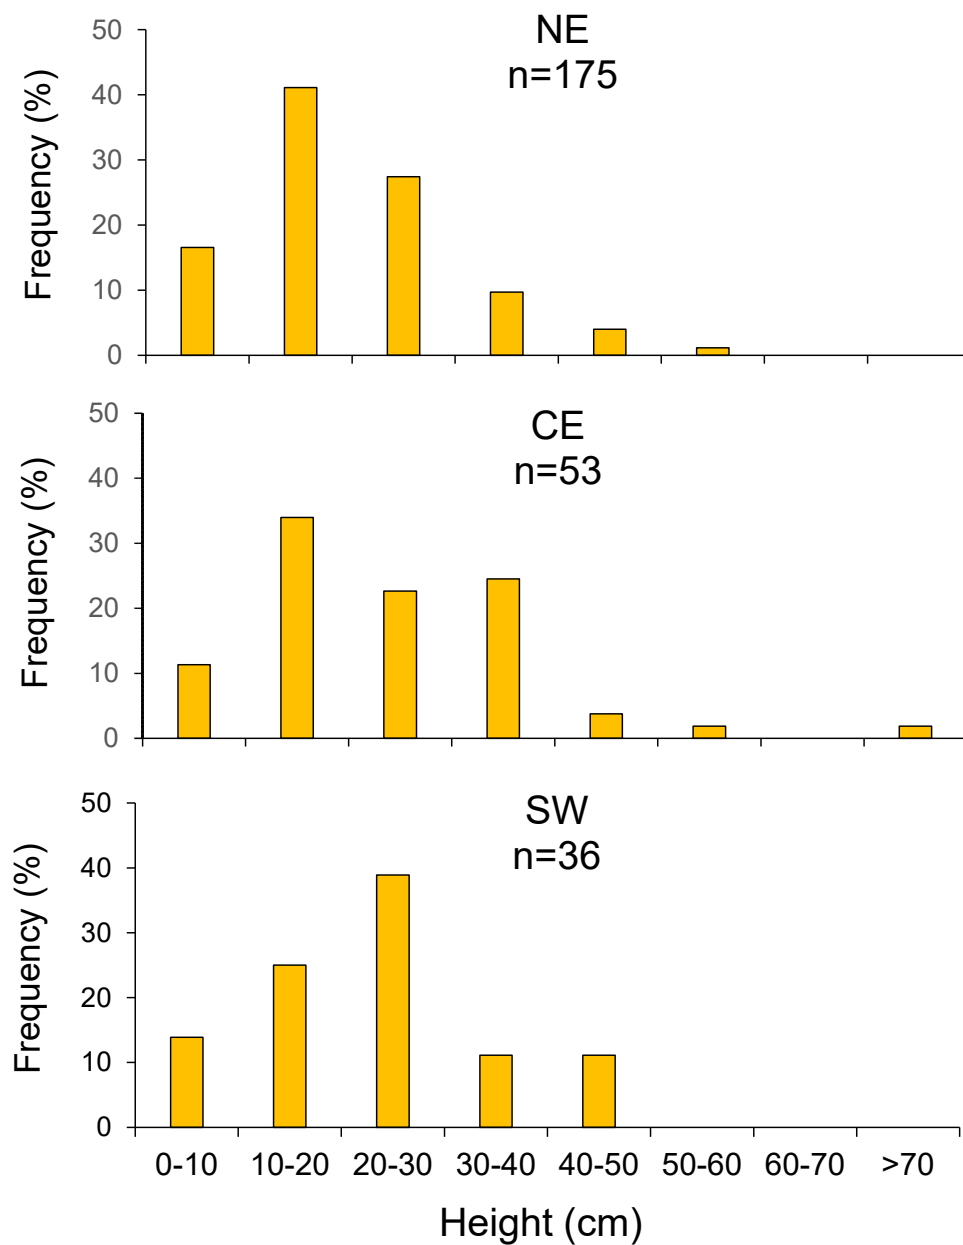

**Figure S5.** Size-frequency distribution of *E. cavolini* colony height in the three investigated areas.

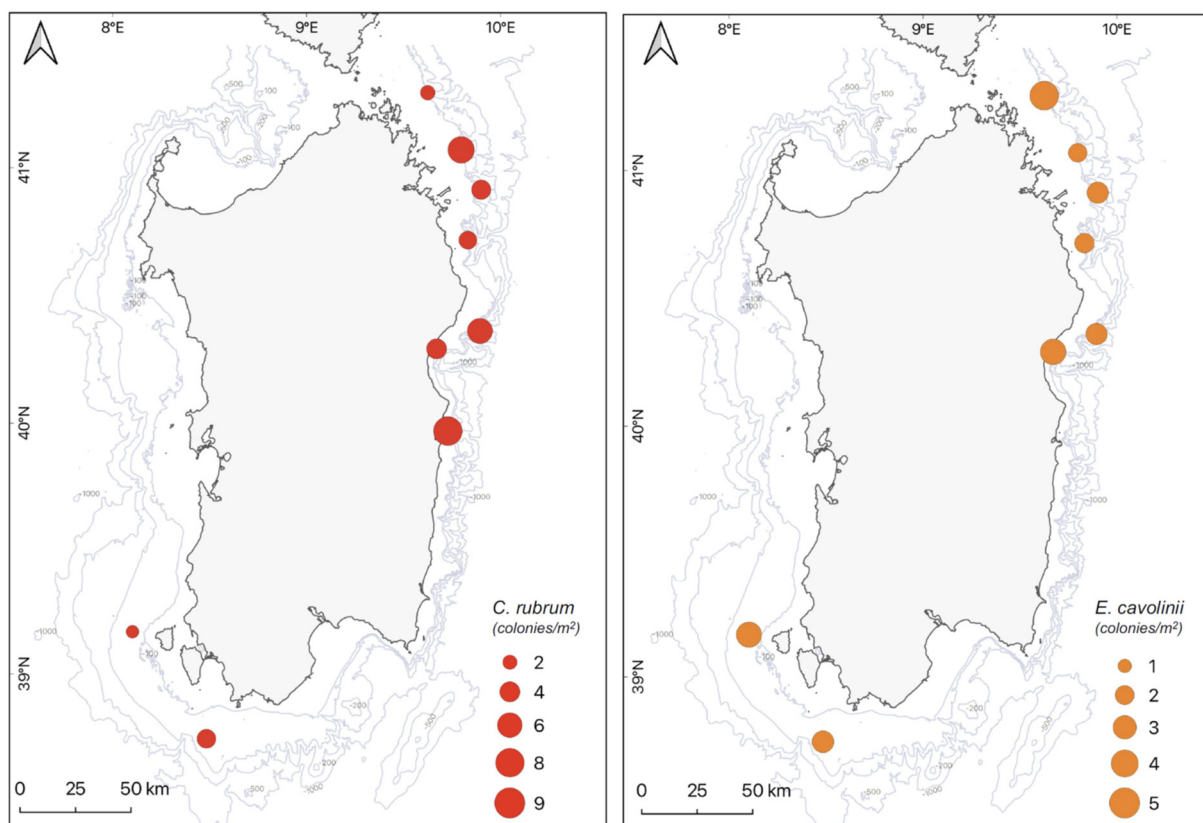

**Figure S6.** Distribution map of the two investigated species (*C. rubrum* on the left, *E. cavolinii* on the right) based on the data obtained during the study.

**Table S1.** Output of the Mann-Whitney pairwise comparison on differences in *C. rubrum* density among the different depth-categories considered in this study.

|         | 90-110         | 111-130        | 131-150        | > 150          |
|---------|----------------|----------------|----------------|----------------|
| 90-110  |                | <b>0.00085</b> | <b>0.02872</b> | <b>0.00394</b> |
| 111-130 | <b>0.00085</b> |                | 0.69350        | 0.28230        |
| 131-150 | <b>0.02872</b> | 0.69350        |                | 0.15930        |
| >151    | <b>0.00394</b> | 0.28230        | 0.15930        |                |

**Table S2.** Output of the Mann-Whitney pairwise comparison on differences in *C. rubrum* height among the different depth-categories considered in this study.

|         | 90-110         | 111-130        | 131-150 | > 150          |
|---------|----------------|----------------|---------|----------------|
| 90-110  |                | 0.92760        | 0.24580 | <b>0.01325</b> |
| 111-130 | 0.92760        |                | 0.37240 | <b>0.02965</b> |
| 131-150 | 0.24580        | 0.37240        |         | 0.11890        |
| >151    | <b>0.01325</b> | <b>0.02965</b> | 0.11890 |                |

**Table S3.** Output of the Mann-Whitney pairwise comparison on differences in *C. rubrum* basal diameter among the different depth-categories considered in this study.

|         | 90-110         | 111-130        | 131-150 | >151           |
|---------|----------------|----------------|---------|----------------|
| 90-110  |                | <b>0.04399</b> | 0.09740 | <b>0.01951</b> |
| 111-130 | <b>0.04399</b> |                | 0.88780 | 0.25860        |
| 131-150 | 0.09740        | 0.88780        |         | 0.25120        |
| >151    | <b>0.01951</b> | 0.25860        | 0.25120 |                |

**Table S4.** Output of the Mann-Whitney pairwise comparison on differences in *C. rubrum* maximum branching pattern among the different depth-categories considered in this study.

|         | 90-110          | 111-130         | 131-150         | >151            |
|---------|-----------------|-----------------|-----------------|-----------------|
| 90-110  |                 | 0.43890         | <b>1.93E-06</b> | <b>8.46E-07</b> |
| 111-130 | 0.43890         |                 | <b>0.00001</b>  | <b>6.63E-06</b> |
| 131-150 | <b>1.93E-06</b> | <b>0.00001</b>  |                 | 0.25650         |
| >151    | <b>8.46E-07</b> | <b>6.63E-06</b> | 0.25650         |                 |

**Table S5.** Output of the Mann-Whitney pairwise comparison on differences in *C. rubrum* orientation among the different depth-categories considered in this study.

|         | 90-110   | 111-130  | 131-150  | >151     |
|---------|----------|----------|----------|----------|
| 90-110  |          | 2.64E-13 | 1.86E-01 | 2.27E-04 |
| 111-130 | 2.64E-13 |          | 1.73E-13 | 0.00002  |
| 131-150 | 1.86E-01 | 1.73E-13 |          | 0.00865  |
| >151    | 2.27E-04 | 0.00002  | 0.00865  |          |

**Table S6.** Output of the Mann-Whitney pairwise comparison on differences in *E. cavolini* density among the different depth-categories considered in this study.

|         | 90-110   | 111-130  | 131-150  | >151     |
|---------|----------|----------|----------|----------|
| 90-110  |          | 3.60E-05 | 4.34E-06 | 2.45E-06 |
| 111-130 | 3.60E-05 |          | 0.43480  | 0.16530  |
| 131-150 | 4.34E-06 | 0.43480  |          | 0.45890  |
| >151    | 2.45E-06 | 0.16530  | 0.45890  |          |

**Table S7.** Output of the Mann-Whitney pairwise comparison on differences in *E. cavolini* height among the different depth-categories considered in this study.

|         | 90-110  | 111-130 | 131-150 | >151    |
|---------|---------|---------|---------|---------|
| 90-110  |         | 0.25130 | 0.02636 | 0.04949 |
| 111-130 | 0.25130 |         | 0.12060 | 0.24600 |
| 131-150 | 0.02636 | 0.12060 |         | 0.78110 |
| >151    | 0.04949 | 0.24600 | 0.78110 |         |

**Table S8.** Output of the Mann-Whitney pairwise comparison on differences in *E. cavolini* orientation among the different depth-categories considered in this study.

|         | 90-110   | 111-130  | 131-150  | >151     |
|---------|----------|----------|----------|----------|
| 90-110  |          | 0.00315  | 0.00007  | 2.03E-26 |
| 111-130 | 0.00315  |          | 2.01E-24 | 1.68E-68 |
| 131-150 | 0.00007  | 2.01E-24 |          | 8.03E-19 |
| >151    | 2.03E-26 | 1.68E-68 | 8.03E-19 |          |



**Table S9.** Results from the sequential test of the Distance based multivariate analysis for a Linear Model (DistLM) based on AIC criterium. The following abbreviations are used: \*\*\* =  $P < 0.001$ ; \* =  $P < 0.05$ ; ns = not significant; Prop. (%) percentage of explained variation; Cumul. (%) cumulative percentage of total variation.

| Variable                             | AIC     | P-value | Prop. (%) | Cumul.<br>(%) |
|--------------------------------------|---------|---------|-----------|---------------|
| <b>A) <i>C. rubrum</i> density</b>   |         |         |           |               |
| Density of <i>E. cavolini</i>        | -176,95 | ***     | 26.7      | 26.7          |
| Height of <i>E. cavolini</i>         | -175,07 | ns      | 0.1       | 26.7          |
| Depth                                | -177,71 | *       | 3.2       | 29.9          |
| <b>B) <i>E. cavolini</i> density</b> |         |         |           |               |
| Height of <i>C. rubrum</i>           | -189,9  | ns      | 3.5       | 3.5           |
| Density of <i>C. rubrum</i>          | -208,08 | ***     | 16.9      | 20.3          |
| Depth                                | -209,73 | *       | 2.7       | 23.1          |
